# Supplementary material for: Human menstrual cycle variation in subcortical functional brain connectivity: a multimodal analysis approach
Source: PubMed Central journal article supplement (PMC7046575; doi:10.1007/s00429-019-02019-z), 2020-01-01

**Article title:**

Human menstrual cycle variation in subcortical functional brain connectivity - a multimodal analysis approach.

**Journal:**

Brain Structure and Function.

**Author names:**

Esmeralda Hidalgo-Lopez, Karsten Mueller, TiAnni Harris, Julia Sacher, Belinda Pletzer.

**Affiliation and e-mail address of the corresponding author:**

Department of Psychology and Centre for Cognitive Neuroscience, University of Salzburg,  
Hellbrunnerstr. 34, 5020 Salzburg, Austria

esmeralda.hidalgolopez@sbg.ac.at

| ICN                                                                                     | Main structures implicated                                                                                                             | Related function                           | Component | Spatial correlation (r) |
|-----------------------------------------------------------------------------------------|----------------------------------------------------------------------------------------------------------------------------------------|--------------------------------------------|-----------|-------------------------|
| <u>Group 1: networks related to emotional and autonomic processes</u>                   |                                                                                                                                        |                                            |           |                         |
| ICN1                                                                                    | Limbic and medial temporal areas                                                                                                       | Emotion discrimination                     | 17        | 0.28                    |
| ICN3                                                                                    | Bilateral basal ganglia and thalamus                                                                                                   | Reward and interoception                   |           | 0.15                    |
| ICN4                                                                                    | Executive control network including anterior insula and cingulate cortex                                                               | Linking cognition and emotion              |           | 0.27                    |
| ICN2                                                                                    | Subgenual ACC and OFC                                                                                                                  | Olfaction, gustation, and emotion          | -         | -                       |
| ICN5                                                                                    | Midbrain                                                                                                                               | Air, hunger                                | 13        | 0.26                    |
| <u>Group 2: networks related to motor and visuospatial integration and coordination</u> |                                                                                                                                        |                                            |           |                         |
| ICN6                                                                                    | Middle and superior frontal gyri and SMA                                                                                               | Movement preparation                       | 14        | 0.46                    |
| ICN7                                                                                    | Middle frontal gyri and posterior parietal lobules                                                                                     | Visuospatial attentional control           | 7         | 0.46                    |
| ICN8                                                                                    | Ventral precentral gyri, central sulci, postcentral gyri, superior and inferior cerebellum                                             | Hand movements                             | 6         | 0.49                    |
| ICN9                                                                                    | Superior parietal lobule (SPL)                                                                                                         | Hand-eye coordination                      | 3         | 0.57                    |
| <u>Group 3: networks related to visual perception.</u>                                  |                                                                                                                                        |                                            |           |                         |
| ICN10                                                                                   | Temporal visual network                                                                                                                | Visual perception                          | 16        | 0.17                    |
| ICN11-12                                                                                | Lateral and medial posterior occipital visual networks                                                                                 | Visual perception                          | 5         | 0.70                    |
| <u>Divergent networks.</u>                                                              |                                                                                                                                        |                                            |           |                         |
| ICN13                                                                                   | Medial prefrontal and posterior cingulate/precuneus                                                                                    | Default mode network                       | 19        | 0.61                    |
| ICN14                                                                                   | Cerebellum                                                                                                                             | Action and somesthesia                     | -         | -                       |
| ICN15                                                                                   | Right-lateralized fronto-parietal network including right inferior frontal gyrus                                                       | Reasoning and working memory               | 11        | 0.46                    |
| ICN16                                                                                   | Primary auditory cortices                                                                                                              | Audition                                   | 8         | 0.42                    |
| ICN17                                                                                   | Dorsal central cerebellar network, including dorsal precentral gyri, central sulci, postcentral gyri, superior and inferior cerebellum | Action, speech and diverse mouth movements | 1         | 0.66                    |
| ICN18                                                                                   | Left-lateralized fronto-parietal network, including Broca's and Wernicke's areas                                                       | Verbal and memory tasks                    | 10        | 0.41                    |

**Table 1.** Correspondence between intrinsic connectivity networks (ICN) by Laird et al. (2011) and components extracted from group independent component analysis.

**Figure 1:** Resting state seed-based connectivity of the left (a) and right (b) hippocampus, left (c) and right (d) caudate, and left (e) and right (f) putamen in women. Axial slices, z coordinates depicted in mm.

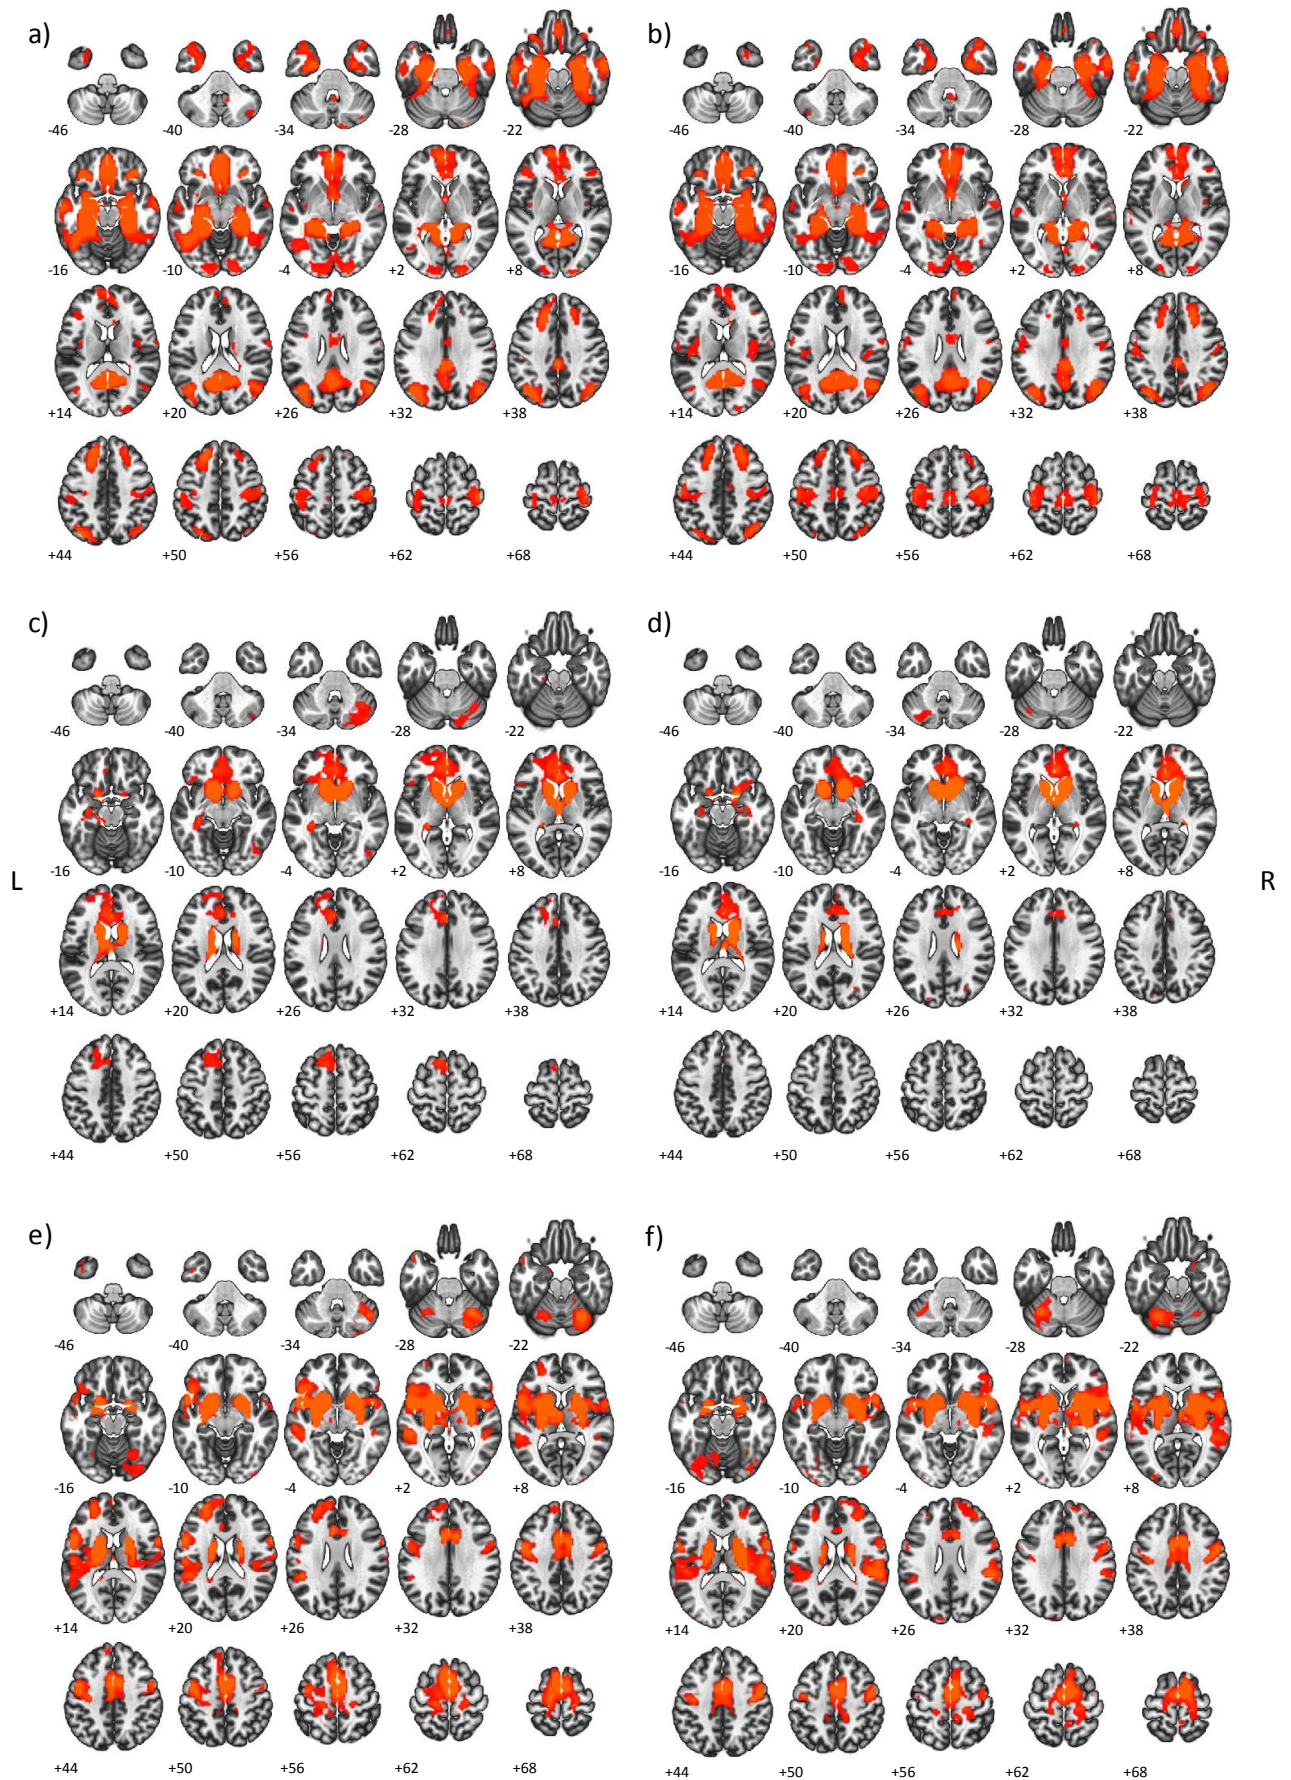

Supplement: 429_2019_2019_MOESM1_ESM.pdf [file 429_2019_2019_MOESM1_ESM.pdf]
